# Supplementary material for: Theoretical exploration of diverse electron-deficient core and terminal groups in A–DA′D–A type non-fullerene acceptors for organic solar cells
Source: Royal Society of Chemistry journal article supplement (doi:10.1039/d1nj04571g), 2022-01-01
Supplement: d1nj04571g1.pdf [file d1nj04571g1.pdf]

## SUPPORTING INFORMATION

### **Theoretical Exploration on Diverse Electron-Deficient Core and Terminal Groups in A-DA'D-A Type Non-Fullerene Acceptors for Organic Solar Cells**

*Yueyue Shao*<sup>†</sup>, *Tian Lu*<sup>‡</sup>, *Minjie Li*<sup>\*†</sup>, *Wencong Lu*<sup>\*†‡</sup>

<sup>†</sup>Department of Chemistry, College of Science, Shanghai University, Shanghai 200444,  
P.R. China

<sup>‡</sup>Materials Genome Institute, Shanghai University, Shanghai, 200444, China

*Tel: +86-21-66133513*

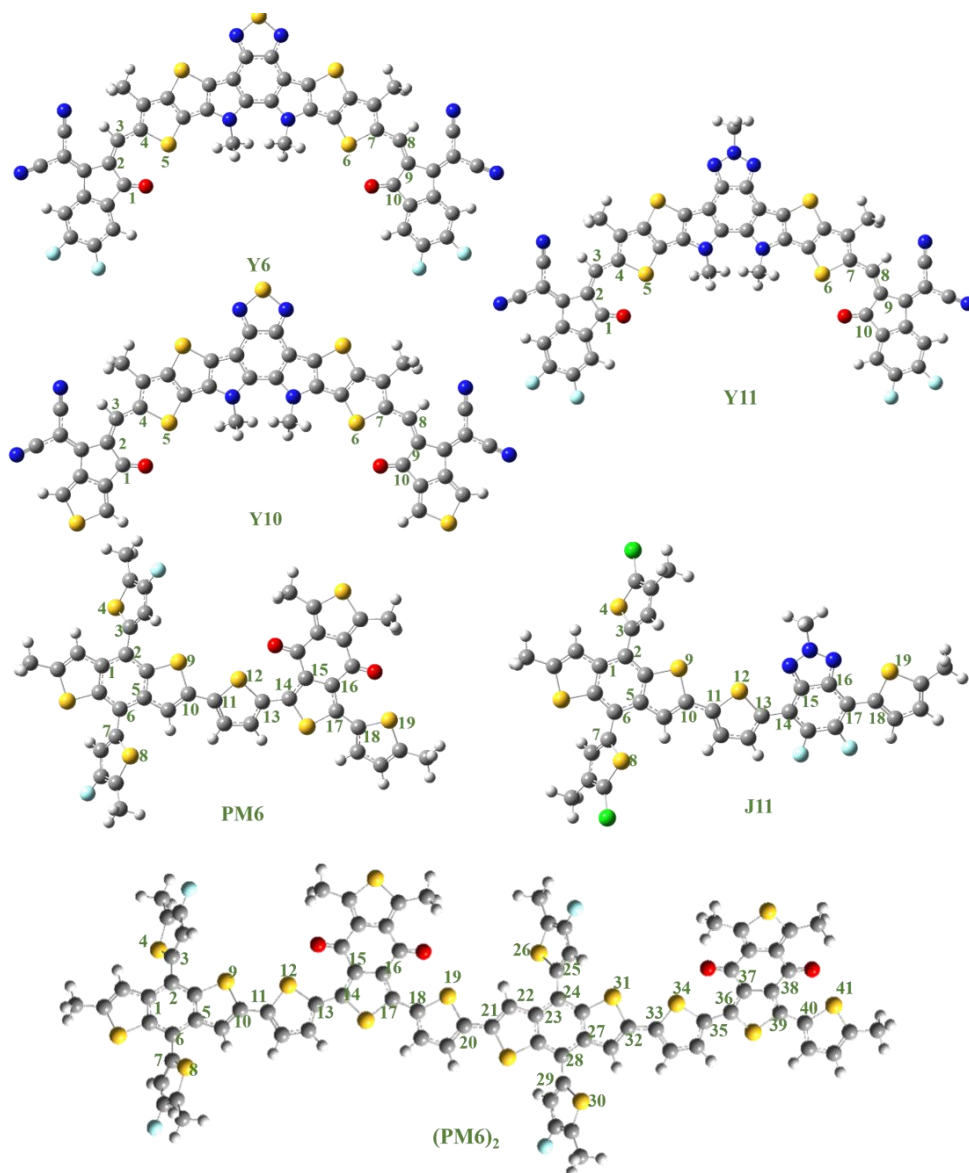

**Fig. S1** The optimized molecular structures of the investigated molecule.

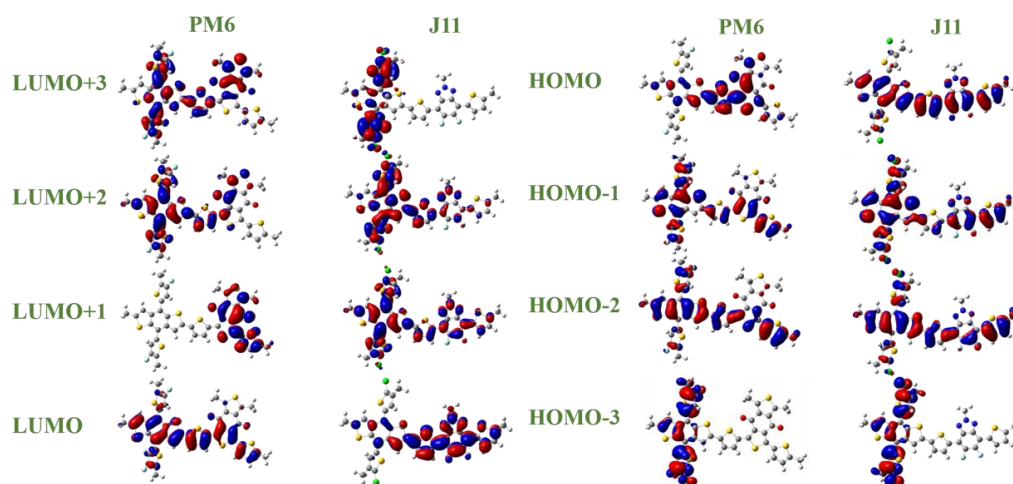

**Fig. S2** The frontier molecular orbitals for polymers.

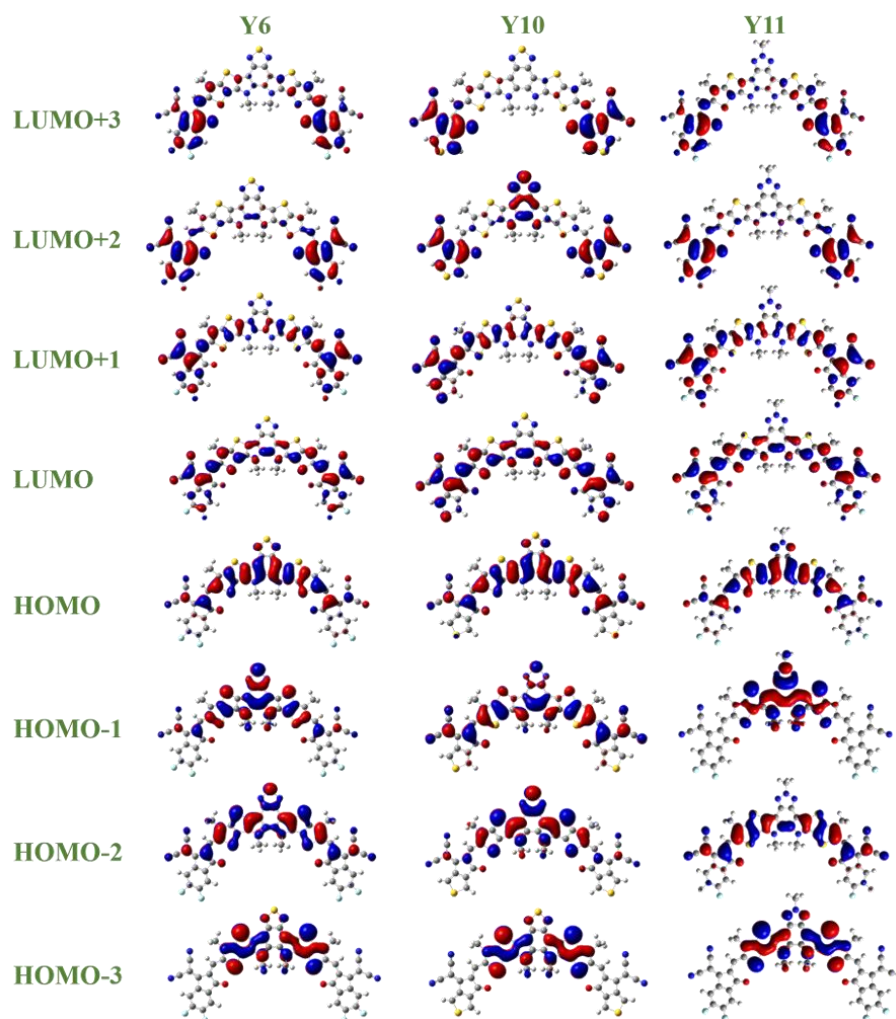

**Fig. S3** The frontier molecular orbitals for NFAs.

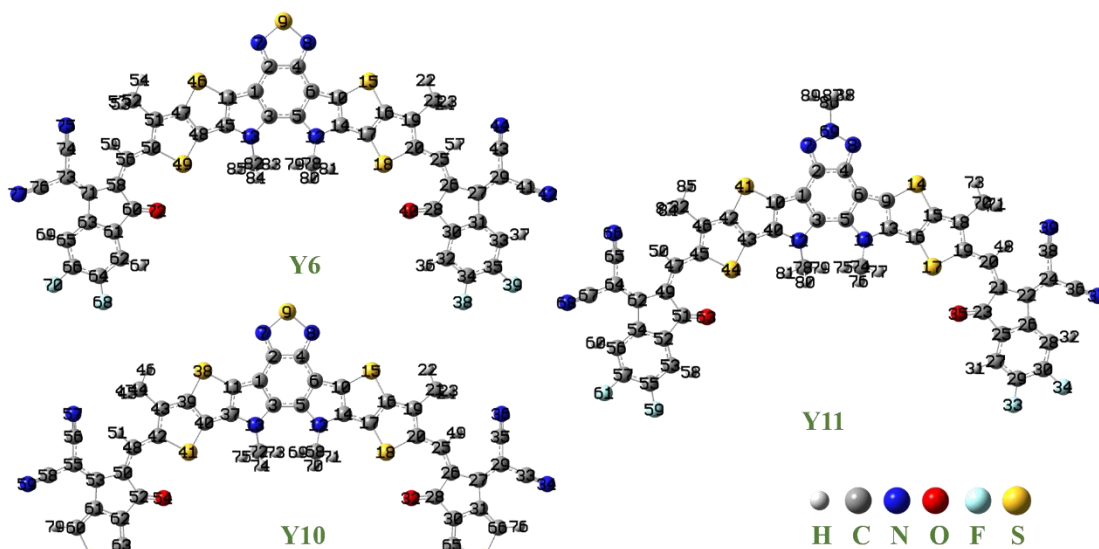

**Fig. S4** The atom numbers for NFAs

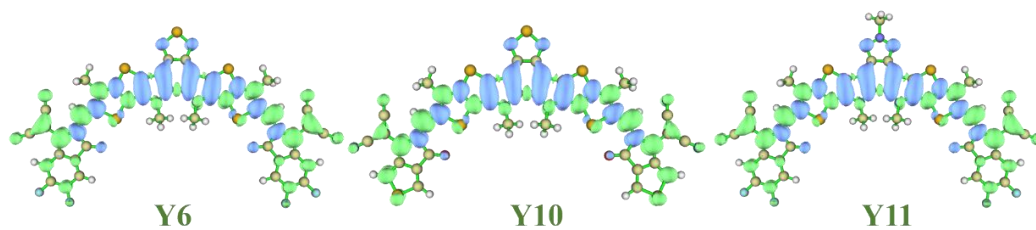

**Fig. S5** The charge density difference of  $S_0 \rightarrow S_1$  of Y6, Y10 and Y11. (Green and blue represent the increase and decrease of the density of the excited state relative to that of the ground state, respectively.) (Isosurface = 0.0005 a.u.)

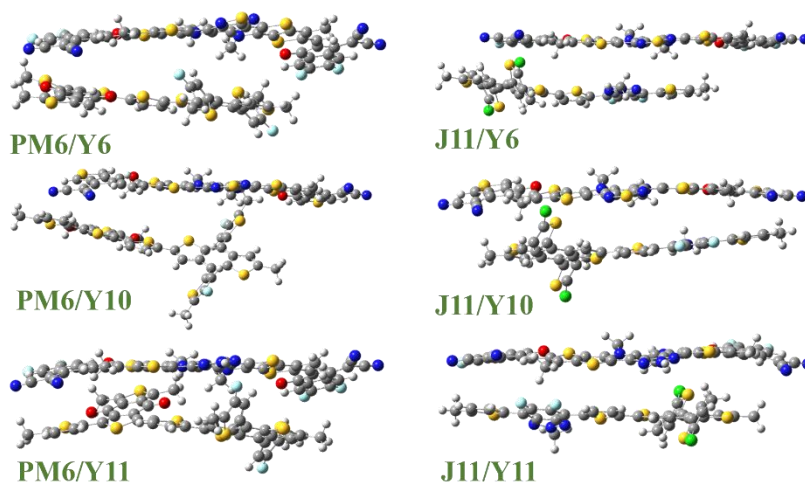

**Fig. S6** The optimized structures of all D/A interfaces.

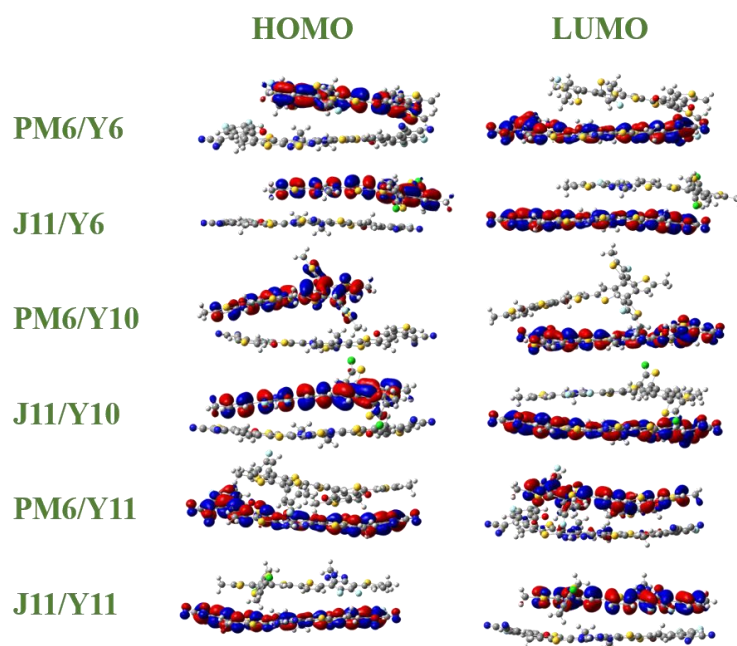

**Fig. S7** The frontier molecular orbitals for D/A interfaces.

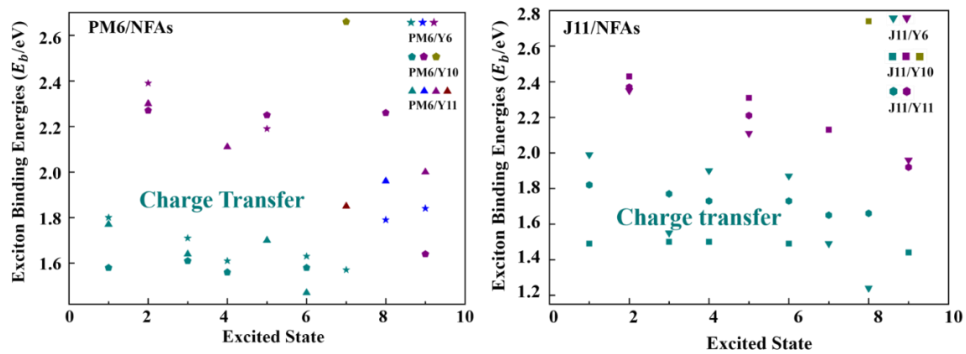

**Fig. S8** Exciton binding energy ( $E_b$ ) of D/A interfaces.

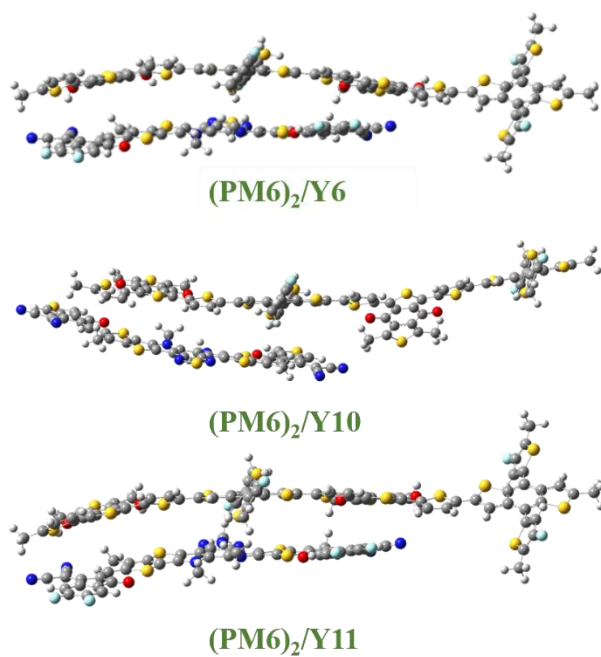

**Fig. S9** The optimized structures of (PM6)<sub>2</sub>/Y6, (PM6)<sub>2</sub>/Y10 and (PM6)<sub>2</sub>/Y11.

**Table S1** The maximum absorption wavelength of Y6 calculated by different functionals with the 6-31G(d,p) basis set compared with experimental value.

| Methods                         | Theoretical | Absolute error | Relative error |
|---------------------------------|-------------|----------------|----------------|
| <b>B3LYP</b>                    | 721.49      | 9.51           | 1.30%          |
| <b>CAM-B3LYP</b>                | 589.97      | 140.03         | 19.15%         |
| <b>M06</b>                      | 684.98      | 46.02          | 6.29%          |
| <b>PBE0</b>                     | 688.20      | 41.80          | 5.72%          |
| <b>BHandHLYP</b>                | 602.16      | 128.84         | 17.62%         |
| <b><math>\omega</math>B97XD</b> | 567.16      | 163.84         | 22.41%         |

**Table S2** The bond length and dihedral angle for NFAs, polymers and interfaces.

| Length/ $\text{\AA}$       | C <sub>2</sub> -C <sub>3</sub>                                 | C <sub>3</sub> -C <sub>4</sub>                                 | C <sub>7</sub> -C <sub>8</sub>                                 | C <sub>8</sub> -C <sub>9</sub>                                  |
|----------------------------|----------------------------------------------------------------|----------------------------------------------------------------|----------------------------------------------------------------|-----------------------------------------------------------------|
| <b>Y6</b>                  | 1.38                                                           | 1.41                                                           | 1.41                                                           | 1.38                                                            |
| <b>Y10</b>                 | 1.38                                                           | 1.41                                                           | 1.41                                                           | 1.38                                                            |
| <b>Y11</b>                 | 1.38                                                           | 1.41                                                           | 1.41                                                           | 1.38                                                            |
| Dihedral angle/ $^{\circ}$ | C <sub>1</sub> -C <sub>2</sub> -C <sub>3</sub> -C <sub>4</sub> | C <sub>2</sub> -C <sub>3</sub> -C <sub>4</sub> -C <sub>5</sub> | C <sub>6</sub> -C <sub>7</sub> -C <sub>8</sub> -C <sub>9</sub> | C <sub>7</sub> -C <sub>8</sub> -C <sub>9</sub> -C <sub>10</sub> |
| <b>Y6</b>                  | 0.26                                                           | 0.10                                                           | 0.09                                                           | 0.26                                                            |
| <b>Y10</b>                 | 0.37                                                           | 0.41                                                           | 0.41                                                           | 0.37                                                            |
| <b>Y11</b>                 | 0.19                                                           | -0.10                                                          | 0.13                                                           | 0.22                                                            |

  

| Length/ $\text{\AA}$ | C <sub>2</sub> -C <sub>3</sub> | C <sub>6</sub> -C <sub>7</sub> | C <sub>10</sub> -C <sub>11</sub> | C <sub>13</sub> -C <sub>14</sub> |
|----------------------|--------------------------------|--------------------------------|----------------------------------|----------------------------------|
| <b>PM6</b>           | 1.47                           | 1.45                           | 1.45                             | 1.45                             |

|                          |                                                                    |                                                                    |                                                                    |                                                                    |                                                                    |
|--------------------------|--------------------------------------------------------------------|--------------------------------------------------------------------|--------------------------------------------------------------------|--------------------------------------------------------------------|--------------------------------------------------------------------|
| <b>J11</b>               | 1.47                                                               |                                                                    | 1.45                                                               | 1.45                                                               | 1.46                                                               |
| <b>Dihedral angle/°</b>  | <b>C<sub>1</sub>-C<sub>2</sub>-C<sub>3</sub>-S<sub>4</sub></b>     | <b>C<sub>5</sub>-C<sub>6</sub>-C<sub>7</sub>-S<sub>8</sub></b>     | <b>S<sub>9</sub>-C<sub>10</sub>-C<sub>11</sub>-S<sub>12</sub></b>  | <b>S<sub>12</sub>-C<sub>13</sub>-C<sub>14</sub>-C<sub>15</sub></b> | <b>C<sub>16</sub>-C<sub>17</sub>-C<sub>18</sub>-S<sub>19</sub></b> |
| <b>PM6</b>               | 56.39                                                              | -55.99                                                             | 18.28                                                              | -17.09                                                             | 20.97                                                              |
| <b>J11</b>               | 57.26                                                              | -56.81                                                             | 19.43                                                              | -0.83                                                              | 0.87                                                               |
| <b>(PM6)<sub>2</sub></b> | 56.38                                                              | -55.89                                                             | 18.91                                                              | 15.53                                                              | -17.95                                                             |
| <b>Dihedral angle/°</b>  | <b>C<sub>23</sub>-C<sub>24</sub>-C<sub>25</sub>-S<sub>26</sub></b> | <b>C<sub>27</sub>-C<sub>28</sub>-C<sub>29</sub>-S<sub>30</sub></b> | <b>S<sub>31</sub>-C<sub>32</sub>-C<sub>33</sub>-S<sub>34</sub></b> | <b>S<sub>34</sub>-C<sub>35</sub>-C<sub>36</sub>-C<sub>37</sub></b> | <b>C<sub>38</sub>-C<sub>39</sub>-C<sub>40</sub>-S<sub>41</sub></b> |
| <b>(PM6)<sub>2</sub></b> | 55.71                                                              | -56.49                                                             | 18.58                                                              | 15.85                                                              | -20.89                                                             |

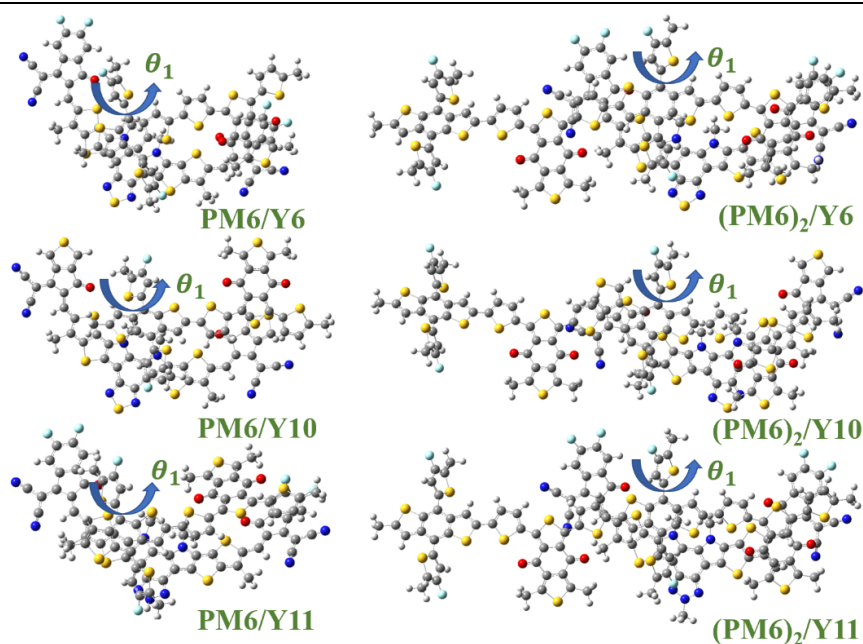

|                         |                                         |                                               |                                          |                                                            |                                                             |                                                             |
|-------------------------|-----------------------------------------|-----------------------------------------------|------------------------------------------|------------------------------------------------------------|-------------------------------------------------------------|-------------------------------------------------------------|
| <b>Dihedral angle/°</b> | <b><math>\theta_1</math><br/>PM6/Y6</b> | <b><math>\theta_1</math><br/>PM6/Y<br/>10</b> | <b><math>\theta_1</math><br/>PM6/Y11</b> | <b><math>\theta_1</math><br/>(PM6)<sub>2</sub><br/>/Y6</b> | <b><math>\theta_1</math><br/>(PM6)<sub>2</sub><br/>/Y10</b> | <b><math>\theta_1</math><br/>(PM6)<sub>2</sub><br/>/Y11</b> |
| <b>Interfaces</b>       | 56.51                                   | 54.74                                         | 58.50                                    | 56.50                                                      | 55.15                                                       | 56.33                                                       |

**Table S3** The HOMO and LUMO energy levels and HOMO-LUMO gap of BTD, BTZ, TC and FIC.

| <b>E/eV</b> | <b>HOMO</b> | <b>LUMO</b> | <b>HOMO-LUMO gap</b> |
|-------------|-------------|-------------|----------------------|
| <b>BTD</b>  | -6.62       | -2.36       | 4.26                 |
| <b>BTZ</b>  | -6.15       | -1.25       | 4.90                 |
| <b>TC</b>   | -7.03       | -3.26       | 3.77                 |
| <b>FIC</b>  | -7.24       | -3.41       | 3.83                 |



**Table S4** The  $V_{oc}$  of investigated polymers/NFAs OSCs devices.

| Interfaces   | PM6/Y6 | J11/Y6 | PM6/Y10 | J11/Y10 | PM6/Y11 | J11/Y11 |
|--------------|--------|--------|---------|---------|---------|---------|
| $V_{oc}/V$   | 0.75   | 0.71   | 0.83    | 0.79    | 0.81    | 0.77    |
| $V_{oc}/exp$ | 0.83   | -      | -       | 0.89    | 0.85    | -       |

**Table S5** The optical absorption properties of all investigated D/A interfaces.

| PM6/Y6               | Main transition configuration                     | $\frac{E/e}{V}$ | $\lambda_{abs}/nm$ | $f$    |
|----------------------|---------------------------------------------------|-----------------|--------------------|--------|
| <b>S<sub>1</sub></b> | H→L(97.04%);H→L+1(2.32%)                          | 1.52            | 817.66             | 0.0007 |
| <b>S<sub>2</sub></b> | H-1→L(97.93%)                                     | 1.70            | 727.40             | 1.9341 |
| <b>S<sub>3</sub></b> | H-2→L(9.18%);H→L+1(87.81%)                        | 1.79            | 694.71             | 0.0016 |
| <b>S<sub>4</sub></b> | H-2→L(87.93%);H→L+1(9.14%)                        | 1.95            | 637.05             | 0.0005 |
| <b>S<sub>5</sub></b> | H-1→L+1(96.01%)                                   | 2.03            | 610.43             | 0.1558 |
| <b>J11/Y6</b>        |                                                   |                 |                    |        |
| <b>S<sub>1</sub></b> | H→L(89.73%);H→L+1(9.69%)                          | 1.41            | 881.11             | 0.0074 |
| <b>S<sub>2</sub></b> | H-1→L(97.30%)                                     | 1.71            | 725.11             | 1.9973 |
| <b>S<sub>3</sub></b> | H-<br>2→L(6.65%);H→L(8.64%);H→L+1(8<br>1.63%)     | 1.72            | 720.06             | 0.0320 |
| <b>S<sub>4</sub></b> | H-2→L(81.82%);H-<br>2→L+1(10.11%);H→L+1(6.06%)0.0 | 1.89            | 655.18             | 0.0008 |
| <b>S<sub>5</sub></b> | H-1→L+1(94.76%)                                   | 2.03            | 609.80             | 0.1820 |
| <b>PM6/Y10</b>       |                                                   |                 |                    |        |
| <b>S<sub>1</sub></b> | H→L(97.63%)                                       | 1.55            | 799.43             | 0.0005 |
| <b>S<sub>2</sub></b> | H-1→L(98.41%)                                     | 1.70            | 727.38             | 2.1234 |
| <b>S<sub>3</sub></b> | H-2→L(25.48%);H→L+1(72.79%)                       | 1.84            | 673.73             | 0.0034 |
| <b>S<sub>4</sub></b> | H-2→L(73.03%);H→L+1(25.12%)                       | 1.95            | 635.18             | 0.0001 |
| <b>S<sub>5</sub></b> | H-1→L+1(96.71%)                                   | 2.09            | 592.48             | 0.2391 |
| <b>J11/Y10</b>       |                                                   |                 |                    |        |
| <b>S<sub>1</sub></b> | H→L(99.13%)                                       | 1.47            | 843.91             | 0.0036 |
| <b>S<sub>2</sub></b> | H-1→L(98.49%)                                     | 1.71            | 725.54             | 2.1259 |
| <b>S<sub>3</sub></b> | H-2→L(13.30%);H→L+1(86.12%)                       | 1.76            | 705.44             | 0.0007 |
| <b>S<sub>4</sub></b> | H-2→L(85.12%);H→L+1(13.38%)                       | 1.93            | 643.88             | 0.0029 |
| <b>S<sub>5</sub></b> | H-1→L+1(97.33%)                                   | 2.09            | 592.48             | 0.2776 |
| <b>PM6/Y11</b>       |                                                   |                 |                    |        |
| <b>S<sub>1</sub></b> | H→L(92.14%);H→L+1(2.98%)                          | 1.58            | 784.38             | 0.0455 |
| <b>S<sub>2</sub></b> | H-1→L(95.95%)                                     | 1.67            | 743.28             | 1.8785 |
| <b>S<sub>3</sub></b> | H-2→L(20.33%); H→L+1(69.38%)                      | 1.84            | 672.54             | 0.0324 |
| <b>S<sub>4</sub></b> | H-1→L+1(83.88%);H→L+1(9.53%)                      | 1.99            | 623.14             | 0.1207 |
| <b>S<sub>5</sub></b> | H-2→L(74.95%);H-1→L+1(7.85%);<br>H→L+1(16.06%)    | 2.02            | 614.08             | 0.0093 |



| <b>J11/Y11</b>       |                             |      |        |        |
|----------------------|-----------------------------|------|--------|--------|
| <b>S<sub>1</sub></b> | H→L(95.48%)                 | 1.47 | 845.17 | 0.0004 |
| <b>S<sub>2</sub></b> | H→1-L(97.70%)               | 1.68 | 739.79 | 1.8290 |
| <b>S<sub>3</sub></b> | H-2→L(12.58%);H→L+1(83.21%) | 1.72 | 719.14 | 0.0049 |
| <b>S<sub>4</sub></b> | H-2→L(85.10%);H→L+1(12.51%) | 1.97 | 629.73 | 0.0028 |
| <b>S<sub>5</sub></b> | H-1→L+1(95.33%)             | 2.00 | 618.88 | 0.1329 |

**Table S6** Key parameters related to reorganization energy of all investigated D/A interfaces.

| <b>Interfaces</b> | $\lambda_{in}(D)/eV$ | $\lambda_{in}(A)/eV$ | $\lambda_{in}/eV$ | $\lambda_{tot}/eV$ |
|-------------------|----------------------|----------------------|-------------------|--------------------|
| <b>PM6/Y6</b>     | 0.136                | 0.077                | 0.213             | 1.313              |
| <b>J11/Y6</b>     | 0.137                | 0.077                | 0.214             | 1.314              |
| <b>PM6/Y10</b>    | 0.136                | 0.072                | 0.208             | 1.308              |
| <b>J11/Y10</b>    | 0.137                | 0.072                | 0.209             | 1.309              |
| <b>PM6/Y11</b>    | 0.136                | 0.076                | 0.212             | 1.312              |
| <b>J11/Y11</b>    | 0.137                | 0.076                | 0.213             | 1.313              |

**Table S7** Key parameters related to charge integral ( $V_{DA}$ ) of all investigated D/A interfaces.

| <b>Interfaces</b> | $\Delta E/eV$ | $\mu_{tr}/a.u.$ | $\Delta\mu_{tr}/a.u.$ | $V_{DA}/eV$ |
|-------------------|---------------|-----------------|-----------------------|-------------|
| <b>PM6/Y6</b>     | 0.055         | 0.134           | -7.459                | 0.027       |
| <b>J11/Y6</b>     | 0.052         | 0.462           | 8.537                 | 0.076       |
| <b>PM6/Y10</b>    | 0.057         | 0.114           | 6.215                 | 0.028       |
| <b>J11/Y10</b>    | 0.054         | 0.315           | 5.509                 | 0.083       |
| <b>PM6/Y11</b>    | 0.058         | 1.080           | 3.019                 | 0.461       |
| <b>J11/Y11</b>    | 0.053         | 0.108           | 7.710                 | 0.021       |

**Table S8** Key parameters related to Gibbs free energy ( $\Delta G$ ) of all investigated D/A interfaces.

| <b>Interfaces</b> | $E_{IP}(D)/eV$ | $E_{EA}(A)/eV$ | $\Delta G_{CR}/eV$ | $E_{S1}/eV$ | $E_b/eV$ | $\Delta G_{CS}/eV$ |
|-------------------|----------------|----------------|--------------------|-------------|----------|--------------------|
| <b>PM6/Y6</b>     | 5.987          | 2.775          | -3.212             | 2.306       | 1.800    | -0.894             |
| <b>J11/Y6</b>     | 5.972          | 2.775          | -3.197             | 2.395       | 1.980    | -1.178             |
| <b>PM6/Y10</b>    | 5.987          | 2.690          | -3.297             | 2.306       | 1.570    | -0.574             |
| <b>J11/Y10</b>    | 5.972          | 2.690          | -3.282             | 2.395       | 1.497    | -0.610             |
| <b>PM6/Y11</b>    | 5.987          | 2.707          | -3.280             | 2.306       | 1.771    | -0.797             |
| <b>J11/Y11</b>    | 5.972          | 2.707          | -3.265             | 2.395       | 1.821    | -0.951             |

**Table S9** Dynamic parameters of (PM6)<sub>2</sub>/Y6, (PM6)<sub>2</sub>/Y10 and (PM6)<sub>2</sub>/Y11 interfaces, including  $\lambda_{\text{tot}}$ ,  $\Delta G_{\text{CR}}$ ,  $\Delta G_{\text{CS}}$ ,  $V_{\text{DA}}$ ,  $K_{\text{CR}}$  and  $K_{\text{CS}}$ .

| <b>Interfaces</b>            | $\lambda_{\text{tot}}$<br>/eV | $\Delta G_{\text{CR}}$<br>/eV | $\Delta G_{\text{CS}}$<br>/eV | $V_{\text{DA}}$<br>/eV | $K_{\text{CR}}/\text{s}^{-1}$ | $K_{\text{CS}}/\text{s}^{-1}$ | $K_{\text{CS}}/K_{\text{CR}}$ |
|------------------------------|-------------------------------|-------------------------------|-------------------------------|------------------------|-------------------------------|-------------------------------|-------------------------------|
| <b>(PM6)<sub>2</sub>/Y6</b>  | 1.267                         | -2.840                        | -0.731                        | 0.008                  | $6.675 \times 10^3$           | $1.180 \times 10^{11}$        | $1.768 \times 10^7$           |
| <b>(PM6)<sub>2</sub>/Y10</b> | 1.263                         | -2.918                        | -0.478                        | 0.024                  | $8.722 \times 10^3$           | $8.097 \times 10^{10}$        | $9.284 \times 10^6$           |
| <b>(PM6)<sub>2</sub>/Y11</b> | 1.267                         | -2.910                        | -0.616                        | 0.316                  | $1.682 \times 10^6$           | $5.884 \times 10^{13}$        | $3.496 \times 10^7$           |

Molecular polarity index (MPI) of the molecules were calculated based on the distribution characteristics of the surface ESP (electron density isosurfaces of 0.001 a.u.). The value of MPI can be given through the following formula:<sup>1</sup>

$$\text{MPI} = (1/A) \iint_s |V(r)| dS \quad (\text{S1})$$

Where  $V$  is the molecular ESP and  $A$  is the molecular surface area. The greater the MPI, the greater the molecular overall polarity.

The charge transfer amount from fragment D to fragment A ( $Q_{\text{CT}}$ ) of a molecule during electron excitation was calculated by the interfragment charge transfer (IFCT) method. The  $Q_{\text{CT}}$  is defined as follows:<sup>2-3</sup>

$$Q_{\text{D,A}} = \theta_{\text{D,hole}} \theta_{\text{A,ele}} \quad (\text{S2})$$

Where  $\theta_{\text{D,hole}}$  and  $\theta_{\text{A,ele}}$  denote contribution of fragment D to the hole and contribution of fragment A to the electron, respectively.

The IP, EA and  $\eta$  can be calculated by the following formula:<sup>4</sup>

$$IP = E^+(M_0) - E^0(M_0) \quad (\text{S3})$$

$$EA = E^0(M_0) - E^-(M_0) \quad (\text{S4})$$

$$\eta = \frac{IP - EA}{2} \quad (\text{S5})$$

The electron reorganization energy ( $\lambda_e$ ) can be calculated by the following formula:<sup>5-7</sup>

$$\lambda_e = E^-(M_0) - E^-(M_-) + E^0(M_-) - E^0(M_0) \quad (\text{S6})$$

In the above formula,  $E^0(M_0)$  is the energy of the neutral molecule in the neutral geometry,  $E^-(M_-)$  is the energy of the anion in the ion geometry Energy,  $E^-(M_0)$  represents the energy of the anion in the neutral geometry,  $E^0(M_-)$  is the energy of the neutral molecule in the anion geometry.

The excited-state lifetime  $\tau$  can be calculated by the following formula:<sup>8</sup>

$$\tau = \frac{1.499}{fE^2} \quad (\text{S7})$$

Where  $E$  and  $f$  are the excited-state energy ( $\text{cm}^{-1}$ ) and the oscillator strength, respectively;

The Generalized Mullikan-Hush (GHM) model is widely used to calculate the charge transfer integral  $V_{\text{DA}}$ .<sup>9</sup>

$$V_{\text{DA}} = \frac{\mu_{\text{tr}}\Delta E}{\sqrt{(\Delta\mu)^2 + 4(\mu_{\text{tr}})^2}} \quad (\text{S8})$$

Where  $\Delta E$  is the energy difference between the initial state and the final state;  $\Delta\mu$  is the dipole moment difference;  $\mu_{\text{tr}}$  is the transition dipole moment. Among them,  $\Delta\mu$  is measured using the Hellmann-Feynman theorem under the finite field method. When the existence of static external electric field  $F$ , the transition energy related to the electric field  $F$  can be expressed by the following formula:<sup>10-11</sup>

$$E_{\text{ext}}(F) = E_{\text{ext}}(0) - \Delta\mu F - \frac{1}{2}\Delta\alpha F^2 \quad (\text{S9})$$

Where  $E_{\text{ext}}(0) = \Delta E$  in the formula is the excitation energy of the lowest intermolecular charge-transfer excited state under a zero-field;  $\Delta\alpha$  is the change in polarizability.

The reorganization energy  $\lambda$  is composed of the internal reorganization energy ( $\lambda_{\text{in}}$ ) and the external reorganization energy ( $\lambda_{\text{s}}$ ) of the molecule. The  $\lambda_{\text{in}}$  refers to the energy change of the system caused by the relaxation of the geometric structure when the electron is the gain/lost or the electronic state changes; The  $\lambda_{\text{s}}$  refers to the generation of the electronic and nuclear polarization/relaxation of the surrounding medium. The  $\lambda_{\text{in}}$  can be obtained using the following formula:<sup>12</sup>

$$\lambda_{\text{in}} = \lambda_{\text{in}}(A) + \lambda_{\text{in}}(D) \quad (\text{S10})$$

$$\lambda_{\text{in}}(A) = E(A^-) - E(A) \quad (\text{S11})$$

$$\lambda_{\text{in}}(D) = E(D) - E(D^+) \quad (\text{S12})$$

Where  $E(A)$  and  $E(A^-)$  represent the energies of the optimal ground state of the NFAs and the NFAs of electrically neutral on anion structure, respectively;  $E(D)$  and  $E(D^+)$  represent the energies of optimized donor polymer cation and donor polymer cation on electrically neutral structure, respectively. So far, using quantum chemistry theory to accurately estimate the  $\lambda_{\text{s}}$  of the D/A interface is still relatively complicated. Therefore, in our work, according to the study of Kuss-Petermann and Wenger, the external reorganization energy is regarded as a constant ( $\lambda_{\text{s}}=1.1$  eV).<sup>13</sup>

The  $\Delta G_{\text{CR}}$  of the charge recombination process can be estimated by the following formula:<sup>14</sup>

$$\Delta G_{\text{CR}} = E_{\text{IP}}(\text{D}) - E_{\text{EA}}(\text{A}) \quad (\text{S13})$$

In the formula,  $E_{\text{IP}}(\text{D})$  represents the IP of the donor;  $E_{\text{EA}}(\text{A})$  represents the EA of the acceptor. The  $\Delta G_{\text{CS}}$  of the charge separation process can be estimated by using the Rehm-Weller formula:<sup>15</sup>

$$\Delta G_{\text{CS}} = -\Delta G_{\text{CR}} - E_{\text{S1}} - E_{\text{b}} \quad (\text{S14})$$

Here,  $E_{\text{S1}}$  is the first excited state energy of the free based polymer;  $E_{\text{b}}$  is the lowest ICT exciton binding energy at the D/A interface.

The  $E_{\text{b}}$  is calculated by the following formula:<sup>16-17</sup>

$$E_{\text{b}} = \frac{e^2}{4\pi\epsilon_0\epsilon_r} \iint \frac{\rho_{\text{h}}(\vec{r}_1)\rho_{\text{e}}(\vec{r}_2)}{|\vec{r}_1 - \vec{r}_2|} d^3\vec{r}_1 d^3\vec{r}_2 \quad (\text{S15})$$

Where  $e$  is the elementary charge,  $\epsilon_0$  is the vacuum permittivity,  $\rho_{\text{h}}$  and  $\rho_{\text{e}}$  are the hole density and electron density of the natural transition orbital, respectively,  $\vec{r}_1$  and  $\vec{r}_2$  are the coordinates of  $\rho_{\text{h}}$  and  $\rho_{\text{e}}$ .

## References

- 1 Y. Cui, P. Zhu, X. Shi, X. Liao and Y. Chen, *J. Phys. Chem. C*, 2021, **125**, 10250-10259.
- 2 Z. Liu, T. Lu and Q. Chen, *Carbon*, 2020, **165**, 461-467.
- 3 T. Lu and F. Chen, *J. Comput. Chem.*, 2012, **33**, 580-592.
- 4 N. Janprapa and V. Vchirawongkwin, *Chem. Rev.*, 2018, **510**, 60-69.
- 5 Y. Z. Lu, M. R. Ai, K. F. Ji, L. L. Yan and C. C. Sun, *J. Phys. Chem. A*, 2008, **112**, 12172-12178.
- 6 M. E. Koese, W. J. Mitchell, N. Kopidakis, C. H. Chang, S. E. Shaheen, K. Kim and G. Rumbles, *J. Am. Chem. Soc.*, 2007, **129**, 14257-14270.
- 7 N. Janprapa, V. Vchirawongkwin and C. Kritayakornupong, *Chem. Phys.*, 2018, **510**, 60-69.
- 8 P. H. Ren, C. F. Sun, Y. Shi, P. Song, Y. H. Yang and Y. Z. Li, *J. Mater. Chem. C*, 2019, **7**, 1934-1947.
- 9 P. Song, Y. Li, F. Ma, T. Pullerits and M. Sun, *Chem. Rec.*, 2016, **16**, 734-53.
- 10 P. Song, Y. Z. Li, F. C. Ma, T. Pullerits and M. T. Sun, *J. Phys. Chem. C*, 2013, **117**, 15879-15889.
- 11 Q. G. Wang, Z. Y. Zeng, X. R. Chen, Q. Liu and M. Xu, *J. Photoch. Photobio. A*, 2019, **383**, 111985.
- 12 G. R. Hutchison, M. A. Ratner and T. J. Marks, *J. Am. Chem. Soc.*, 2005, **127**, 2339-2350.
- 13 M. Kuss-Petermann and O. S. Wenger, *J. Am. Chem. Soc.*, 2016, **138**, 1349-58.
- 14 G. J. Kavarnos and N. J. Turro, *Chem. Rev.*, 1986, **86**, 401-449.
- 15 X. Zhang, U. Chi, S. Ji, Y. Wu, S. Peng, K. Han, H. Guo, T. D. James and J. Zhao, *J. Am. Chem. Soc.*, 2009, **131**, 17452.
- 16 S. Kraner, G. Prampolini and G. Cuniberti, *J. Phys. Chem. C*, 2017, **121**, 17088-17095.
- 17 S. Kraner, R. Scholz, F. Plasser, C. Koerner and K. Leo, *J. Chem. Phys.*, 2015, **143**, 244905.
